# Supplementary material
Source: Royal Society of Chemistry journal article supplement (doi:10.1039/d6lc00060f)

(a)

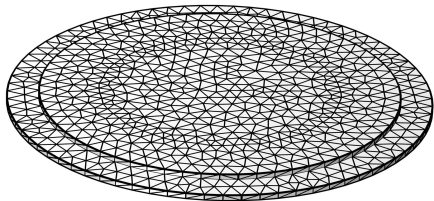

(b)

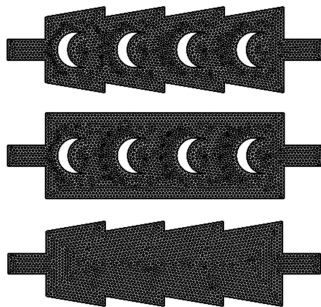

(c)

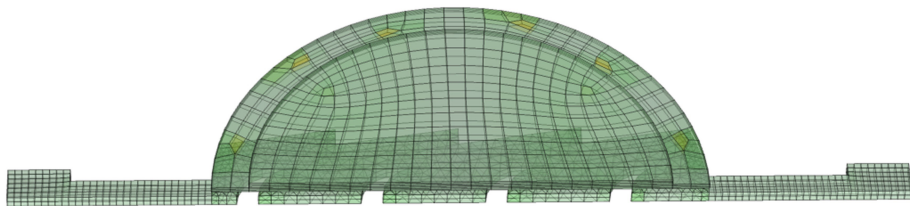

Supplement: d6lc00060f2.pdf [file d6lc00060f2.pdf]

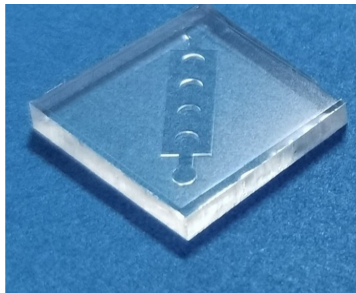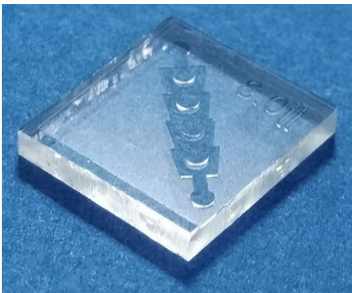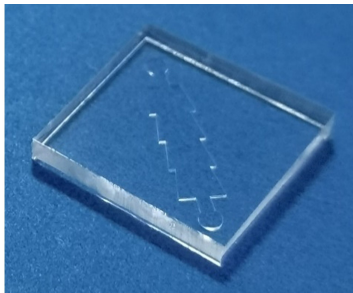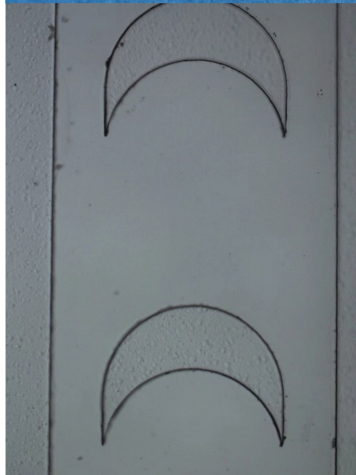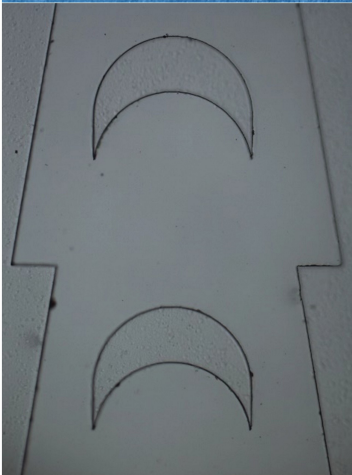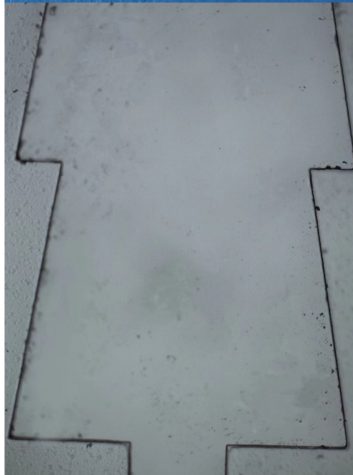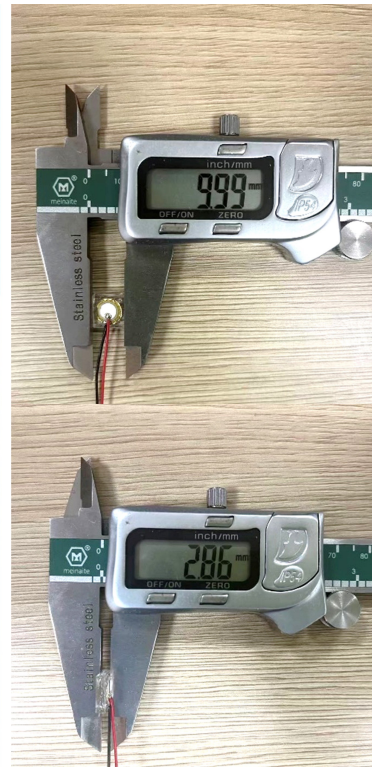

Supplement: d6lc00060f3.pdf [file d6lc00060f3.pdf]

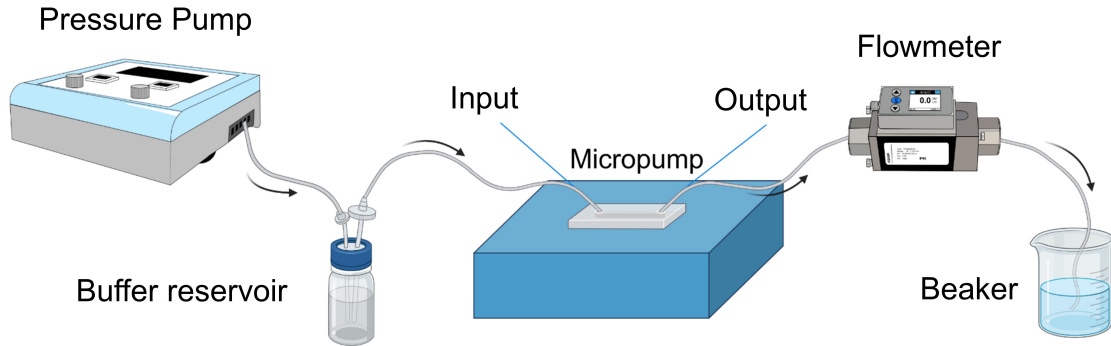

Supplement: d6lc00060f4.pdf [file d6lc00060f4.pdf]

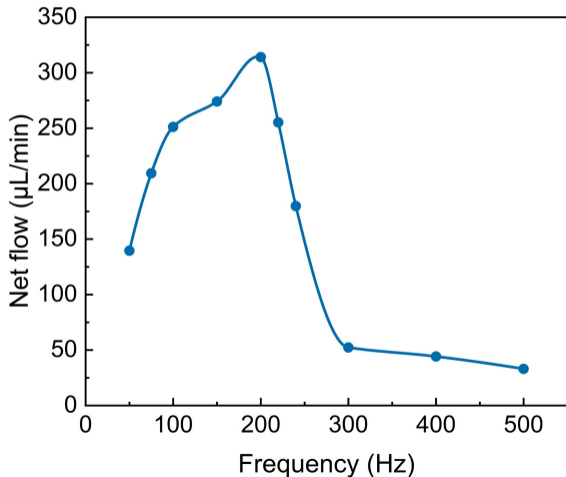

Supplement: d6lc00060f6.pdf [file d6lc00060f6.pdf]
